# Supplementary material
Source: Research Square preprint supplement (doi:10.21203/rs.3.rs-10007171/v1)
Supplement: Supplementary file 1 [file 0329cd16a77c68597eb8c9d5.xlsx]

## Sheet:  Sheet 1
Sheet 1. Proteins identified in the healthy aging cohort.
Proteomic analysis quantified 2411 proteins by LC/MS method
IGKV3-7
IGHV3OR16-12
SAA2-SAA4
IGHV3-49
C4B
C1R
IGHV3-72
C3
CFH
GSN
ITIH3
IGKV1-33
APOB
IGLC7
SSC5D
IGKV2-29
FBLN1
ITIH4
IGLL5
CFI
MASP2
QSOX1
CHL1
NRP1
APOL1
CD5L
FCN3
ATRN
APOM
H6PD
LDHA
GSR
CP
F13A1
F2
HP
HPR
F9
F10
CFD
PLG
F12
CA1
CA2
SERPINC1
SERPINA1
SERPINA3
AGT
A2M
C3
C5
TIMP1
CST3
KNG1
KNG1
IGF2
IGKV3-20
IGLV1-47
IGHV3-7
IGKC
IGHG1
IGHG2
IGHG3
IGHM
IGHA1
IGHA2
APOA1
APOE
APOA2
APOC1
APOC3
FGA
FGB
FGG
APCS
C1QA
C1QB
C1QC
APOH
LRG1
FN1
RBP4
AMBP
AHSG
TTR
ALB
GC
TFRC
TF
HPX
F11
KLKB1
C4BPA
VTN
CAT
FUCA1
PROC
ALDOA
LCAT
HRG
A1BG
VWF
SHBG
GAPDH
ALDOB
APOD
SERPINA5
SERPING1
F13B
CLEC3B
SERPINA7
SERPIND1
ITGB1
BCHE
IGKV2-30
IGKV4-1
GSN
C2
APOA4
ENO1
LDHB
PROS1
CSF1R
CTSD
C8A
C8B
C8G
PFN1
THBS1
SERPINA6
SLC3A2
MMP2
SOD3
LPA
CD14
FCGR3A
SERPINF2
F7
C1S
LTA4H
C4A
POTEI
IGLC2;IGLC3
PTPRF
C7
CLU
HSPA5
MBL2
LAMP1
CETP
IGF2R
COL6A1
COL6A3
F5
ACE
PEPD
NCAM1
C6
PRG2
LCP1
SELL
NID1
PKM
HSP90B1
ANPEP
PVR
CPN1
EZR
CD44
FAH
IGFBP3
VCL
LBP
VCAM1
ITIH2
ITIH1
C4BPB
TNXB
GPX3
CPN2
PROZ
FBLN1
IGFBP6
IGFBP5
TNC
AZGP1
MSN
MST1
PON1
DPP4
CFP
TKT
SERPINA4
PDIA3
PRDX2
CDH5
MAN1A1
THBS4
IGFALS
SERPINF1
CFHR2
GP5
PTGDS
MCAM
BTD
AFM
MASP1
MASP1
COMP
SELENOP
LUM
CRISP3
CACNA2D1
NAGLU
APOC4
PLTP
CDH13
ACTB;ACTG1
LYZ
ACTA1
HBB
GSTO1
GPLD1
HSPG2
CTBS
HGFAC
LRP1
LGALS3BP
BST1
EFEMP1
CNTN1
SPP2
ENPP2
DSG2
SPARCL1
HABP2
ITIH4
ITIH4
POSTN
PCOLCE
PON3
TGFBI
ADIPOQ
IGFBP7
ECM1
MAN2A1
AOC3
ACTBL2
VASN
PLXDC2
PI16
ADAMTSL4
ADAMTS13
ABI3BP
MEGF8
SERPINA11
OAF
CD163
PCSK9
CFHR4
GGH
NEO1
PRG4
CPB2
CNDP1
PGLYRP2
PEBP4
OLFM1
RARRES2
FUCA2
COLEC11
CFHR5
GLIPR2
MMRN2
APMAP
IL1RAP
CRTAC1
B3GNT2
C1RL
FETUB
PCYOX1
SERPINA10
MINPP1
LYVE1
FCGBP
COLEC10
IGKV2-28;IGKV2D-28
IGKV2-24;IGKV2D-24
HLA-B
JCHAIN
IGHG4
ANG
KRT1
S100A8
ALDOC
HSPA8
MRC1
PRCP
INHBC
HBA1
PTPRJ
PTPRS
GPNMB
FCN2
CD109
SEMA4B
PROCR
IGKV3D-15
IGHV6-1
KRT10
C9
P4HB
GP1BA
CDH1
PTPRG
KRT9
FBN1
CAMP
LCN2
CFHR1
APOF
ADGRG6
CPQ
NCAM2
DBH
CFL1
TPI1
FGL1
FAP
PLA2G7
ALCAM
FAM20C
OIT3
GNPTG
IGKV3-11;IGKV3D-11
IGHV3-74
IGKV1-5
A1BG
AMY2A
TIMP2
KRT2
RNF123
CNTN4
ANGPTL6
IGHV3-15
IGHV3-64D
CP
APOC4-APOC2
FCGR3B
GOT1
IL6ST
ADAMTSL2
ADA2
CNTN3
EXTL2
HLA-A
ORM1
S100A9
FLNA
CALR
MDH1
ANTXR2
YWHAZ
ZNF518A
SNED1
IGKV3D-20
CTSB
PTPRM
FLT4
CD93
CTSZ
FBLN5
LTF
LAMP2
ADGRF5
TLN1
B4GAT1
PGK1
COL18A1
GSS
DCD
FERMT3
MARCO
UMOD
KIT
KRT5
ICOSLG
CRP
ICAM1
MET
TALDO1
RAP1B
IGLV3-21
RTN4RL2
ANGPTL3
RELN
CTSF
VNN1
STOM
C1QTNF3
IGHV5-51
IGHV4-30-4;IGHV4-34;IGHV4-38-2;IGHV4-39;IGHV4-59;IGHV4-61
CKM
ORM2
BLVRB
PPBP
IGLV4-69
TPM3
IGFBP4
GDI2
IGKV1-27
PNP
B4GALT1
SELENBP1
HRNR
IGLV7-46
MFAP4
GALNT2
ERAP1
IGHA2
PLEK
CES1
PPIA
CLIC1
IGF1
KRT16
PZP
ART3
IGKV6D-21;IGKV6D-41
PLXNB1
KRT6A
IGFBP2
OGN
CD248
WDR1
BPGM
ITGA2B
EGFR
KRT14
B2M
MMRN1
IGKV1-17
ARHGDIB
SUN3
CHI3L1
ERAP2
ADGRL4
ZG16
MAN2A2
TPM4
IHH
ITLN1
C1S
GPI
CBLN4
IGHV4-28
SLC4A1
CAP1
IGKV1-6
CR2
CORO1A
WDR86
ALDH1A1
IGKV1-8
KRT6B
LIPC
SFN
ITGA2
NME2
IGLV2-11
BLMH
MEGF10
VAT1
LAMB1
SPARC
IGKV1-16
FSTL1
DPEP2
CALML5
TRHDE
TGFBI
NRP2
PIP
NRCAM
TGOLN2
HGFAC
PLXNB2
IGLV1-40
IGLV2-8
AMY1A;AMY1B;AMY1C
DSC3
MYOC
OLFM2
ANXA2
DSG1
IFIT1;IFIT5
STAB1
IDH1
FTL
ENG
CAPZA1
ACTR3
PARVB
GPT
KRT17
B3GNT8
PARK7
ARG1
TFPI
TIE1
ILK
GANAB
ROBO4
EXT2
PLXND1
HLA-A
FGFR1
WARS1
HSPA1L
TUBB1
DSC1
COTL1
C5
HSPA1A;HSPA1B
MYH9
TUBA4A
DSC2
PM20D1
IGLV8-61
ICAM2
L1CAM
TUBA1C
ISLR
IGKV1D-16
PSMA1
SERPINB1
PGD
NOTCH3
SRGN
ARPC4
DAG1
RSU1
CFH
CAPN1
CNTFR
S100A7
ACTN4
GSTP1
COL6A3
RPS27A
GSN
FBP1
YWHAG
MRC2
PSMA7
XPNPEP2
RECK
AK1
MPO
LIMS1
IGKJ3
CTSC
FABP5
CST6
EXT1
F8
MMP9
CRHBP
ITGA1
CAVIN2
IGHD
SERPINB3
TAGLN2
KRT73
CHL1
PODXL
RNASE1
CCL18
SH3BGRL3
PGAM1
PRDX1
SERPING1
ACTN1
RNH1
JUP
SERPINA3
COL1A1
ITGB3
PSMA4
VCP
MADCAM1
ARPC4
SERPINE1
PRSS1
RAB10
KRT75
HBD
KRT80
NIF3L1
CDHR5
CORO1C
KRT3
LSAMP
FLG2
TGFB1
DSP
PSMB6
IGHV3-64
QSOX2
HEXB
SELP
HPD
OSMR
CD84
SAA2
HSPA6
MAN1C1
CLSTN1
PIGR
APP
COL6A2
ALAD
VASP
PKHD1L1
C3
GNAI2
PPIB
KPRP
ADH4
HYOU1
SOD2
TUBB
MGP
HYAL1
KRT78
OPTN
FCRL5
GGCT
ICAM3
CDSN
ANTXR1
PYGB
LMAN1
ARHGDIA
KCTD12
OMD
CHAD
IGHV1-46
IL1R2
AXL
IGKV6-21
SERPINB12
CES1P1
IGLV1-51
ACTR2
LMAN2
NEGR1
CILP2
CEP192
TWNK
ADH1B
ALPL
ENO3
PRDX6
CYCS
IGHV3-38
MASP2
ARPC1B
CA3
LDHAL6B
ST6GALNAC1
HLA-B
CASP14
SEMA3F
ANXA1
HSP90AA1
GHR
PECAM1
PSMA3
PSMA6
LTBP1
HYI
LECT2
TGM3
IGHV1-3
IGHV2-70
IGLL1
GNB2
HLA-A
IGHV1-69
H2BC11;H2BC21
HSP90AB1
YWHAB
UGP2
SVEP1
C1QB
ARPC2
HSPB1
TXN
FBN2
YWHAH
IGHV3OR15-7
IGHV1-18
NAP1L1
IGLV3-27
CTSG
PSMA2
SPRR1A
NUCB1
NOMO1;NOMO2;NOMO3
LILRA3
KRT23
VPS13D
IGHV1-8
GP1BB
PDIA4
PSMB4
PLS1
SLC17A3
KRT4
LGALS7
DEFA1;DEFA3
SFTPB
FLG
CAPZB
H4C1
ARF1
FHL1
ZYX
TUBB6
SPON1
SPINK5
IGLV3-10
IGKJ5
HLA-C
FGG
CREG1
ANXA3
GP9
EEF1A1;EEF1A1P5
EFEMP1
POSTN
SBSN
RASSF5
PCDH18
IGFBP1
G6PD
RAB15
MGAT2
PKP1
IGLV1-36
MYL12A;MYL12B
ARPC3
ADH1A
TYMP
RNASE4
PGM1
KLK7
EIF5A
ANGPTL8
CDHR2
TPM1
FCN1
SLC2A1
PRTN3
PEBP1
RAB14
RAN
IL13RA1
CRYZ
H2AC21
CDC5L
C1QA
IGKV1-13;IGKV1D-13
IGHE
GPX1
ANXA6
GUSB
PLS3
CD59
RAC2
TUBB8
OLA1
NTM
AGRN
IGLV3-19
ANXA5
PPIC
RHOA
WDR75
IGLV10-54
HEG1
PDLIM1
DNM1L
ELANE
AHCY
MYL9
S100A4
PTPN6
ST13
RAB7A
ENPEP
RAB11B
TKFC
KRT77
SERPINA12
FAM3C
PLD4
RAB33B
IGLV9-49
SOD1
COL5A1
EEF1G
CMPK1
SERPINB6
MYL6
GBE1
NCCRP1
ZG16B
SPG11
CLEC4M
S100A14
HPRT1
CSTA
IGLV2-14
CTSA
EEF2
LGALS3
CDH2
TGM1
ATP5F1A
STIP1
PSMB3
GNA13
PDIA6
SHH
ST3GAL6
IGKV1D-8
A2ML1
TPP1
TXNL1
ALDH2
APEH
UBA1
S100A11
MNDA
NPEPPS
EIF6
RAB1A
POF1B
SMPDL3A
ABCB6
DPP3
PA2G4
IGLV5-45
SERPINB2
ATP5F1B
CTSH
H2AC11;H2AC12;H2AC14;H2AC18;H2AC20;H2AJ
SRC
IDE
H1-5
SPRR1B
CANX
GDI1
CAPG
SERPINB4
EPPK1
EIF4A1
DSTN
YWHAE
CLTC
SORD
PFKP
ACY1
CALD1
PLEC
CCL14
ASPRV1
STXBP5
PGM2
PSMB7
DMBT1
CPA4
GFAP
IMPA2
ARPC5
ENTPD5
MACROH2A1
IGLV6-57
SLC25A5
S100A6
VIM
H1-4
EPHA1
HNRNPA2B1
LORICRIN
SPRR2A
SERPINB5
IQGAP1
CAPZA2
ME1
IDH2
FKBP1A
RAC1
CDH17
PCBP1
ADAMTS17
PDCD6IP
MUCL1
SPRR2F
CADM1
FGFBP2
TOLLIP
BIN2
NAGK
IGLV2-18
HLA-A
ACTB
C3
FLNB
PGLYRP1
LYPLA1
SERPINB7
DDAH2
ASS1
LMNA
ASL
HNRNPC
ANXA4
CALM1;CALM2;CALM3
ESD
FABP4
CBR1
RAB5A
PSMB1
S100P
EEF1D
PRDX5
MDH2
NAMPT
SERPINB8
USP14
CDC42
H3-3A;H3-4;H3C1;H3C15
NEXN
LGALSL
H2BC18;H2BC9
PLBD1
S100A7A
TMPRSS6
BPIFB1
S100A16
GSDMA
GLOD4
TUBA8
SH3BGRL2
DDX3X
PHGDH
KLK10
TGM5
PPL
CS
IGLV2-23
GBA1
EIF2S1
PYGL
IVL
APRT
RPSA
HNRNPA1
HSPD1
RALB
CCL5
NCAM1
KRT13
MIF
CD36
NCL
CSRP1
SFPQ
CALML3
PSMA5
PSMB5
CRABP2
RPL12
HSPA4
RPL22
ATP6V1A
VDAC2
CCT5
ALDH9A1
PSMB2
CCT8
BLVRA
UBE2N
HNRNPK
RACK1
TUBB4B
S100A12
ARF5
AHNAK
TRIM29
CTTN
SEPTIN2
SEPTIN7
KPLCE
CTCFL
EVPL
DBNL
PKP3
CTSS
NHERF1
AKR1B10
GMFG
SYNCRIP
PDCD6
PGLS
GLUD1
GOT2
CSTB
RPN1
RPN2
ITGB2
RPLP2
RPLP0
REG1A
H1-0
EPRS1
KRT19
ACAA1
DLD
GAA
PABPC1
HARS1
PRKCSH
GLUL
RPS2
ATP2A2
GM2A
RPL7
IL1RN
KRT15
HK1
ANXA7
RAB6A
ATP6V1B2
VDAC1
PCMT1
ITGA6
RPS3
RPL13
YWHAQ
ERP29
PPP2R1A
RPL4
DDOST
CCT6A
STAT3
CSK
HAL
PAFAH1B1
SSR1
RPL27A
RPS9
RPL29
FASN
TUFM
ANXA11
HNRNPM
YARS1
RPS20
RAP2B
RPL15
NPC2
NUTF2
RPS7
RPS8
RPS15A
RPS16
RPS18
SNRPD3
RPS4X
RPL31
RPL10A
RPL11
RPL8
CCT2
RPL19
HNRNPU
SRSF2
RPL6
GLO1
RPL18
GFUS
SPTAN1
TUBB2A
EIF3A
LASP1
PCBP2
FSCN1
QPCT
H3-7
ANXA8L1
DMKN
NAPRT
PLD3
SEPTIN8
RNPEP
RAB18
IL36G
RCC2
PSME2
HPSE
F11R
IGKV1-37;IGKV1D-37
EIF3E
ETF1
NACA
TUBA1A
KRT19
ACOT7
RAB27B
COPE
MAPK13
PSMD3
SYNGR2
CTSV
CPNE3
ALOX12B
VPS4B
VPS26A
OXSR1
CYB5R3
MT-CO2
IGKV1-39;IGKV1D-39
CAPNS1
RPLP1
NPM1
HMGB1
HMOX1
COX5B
PRKAR1A
CLU
RALA
MTHFD1
CKMT1A
XRCC6
XRCC5
CEACAM1;CEACAM5;CEACAM8
TPT1
FDPS
AKR1A1
DARS1
BPI
ARF4
LMNB1
PAICS
MMP8
EEF1B2
ACP1
DNAJB1
HMGB2
PTBP1
PSMB8
MAPK1
GCA
LAP3
PML
PRDX3
ATP5F1D
LCN1
MAT2A
DSG3
PHB1
GLRX
PSMC2
ATP5F1C
HSPA9
RPS19
EIF2S3
CASP3
RPL35
PSMC4
USP5
PREP
ARCN1
CSNK1A1
CCT3
ALDH7A1
SARS1
RPL14
CCT4
SSR4
ALDH3A2
HSD17B4
HNRNPA3
HK3
COPB1
SUB1
RARS1
AK2
PSMD4
HADHB
HNRNPH2
SUMO2;SUMO3;SUMO4
EIF3B
RAB25
PRPS1
RAB2A
UBE2D3
ACTR1A
RPS3A
RPL27
HSPE1
PPP1CB
PSMC1
PSMC5
RPS14
RPS23
RPS13
RPL7A
RPS6
RPS25
DYNLL1
UBE2L3
PAFAH1B2
PRKDC
RHOG
SRSF3
SLC25A3
KRT76
RPL18A
REG3A
PSME1
DHX9
MAB21L4
AP1B1
ILF3
TARDBP
PSMD2
TUBB3
ASAH1
DCTN2
DDX39B
HNRNPD
DYNC1H1
MVP
PTGR1
KPNB1
PSMD6
PPA1
SF3B3
MYLK
DPYSL2
SYPL1
FBLN7
YOD1
SBSN
OLFM4
FAM83H
SND1
CYFIP1
MYH14
CAND1
PLA2G4D
SDR9C7
RDH11
EPS8L1
TMEM40
HAS1
RAB8B
KHSRP
USP7
FUBP1
ERO1A
CNDP2
VPS35
NIBAN2
PHB2
HSD17B10
MGST2
ACO2
CCT7
TREX2
EIF2A
RNASE7
RNF39
EHD1
RTN4
ARL8B
GLTP
NDUFA13
IL36RN
SERPINB13
DBNL
NUDT5
RALY
PYCARD
PSMD13
RUVBL1
RTCB
NEU2
SQOR
AP1M2
RPS7
LRBA
UBA6
TCAF2
FAM25A;FAM25C;FAM25G
EIF3C;EIF3CL
MMRN1
LMO7
ALDH3A1
MACF1
C3
MYO1C
AP3B1
SULT2B1
PSMD11
PSMD12
PSMD9
PGRMC1
EIF3F
PSMD14
KPNA3
LAD1
TNPO2
SPTBN2
PGRMC2
ZNF185
EIF3H
HNRNPR
TPD52L2
AKR7A2
GET3
NARS1
STRN
BNIP3L
PLIN3
CTNND1
USO1
TOM1
HIP1R
SH3BGRL
ERLIN1
BANF1
GLRX3
ANXA9
SEC31A
SCEL
RTN3
HSPA4L
PTBP3
AP2A1
BAG3
CLIC3
EML2
LY6G6C
NDUFB10
ATP1A1
ATP1B1
CD1A
DBI
FH
LGALS1
CLTB
PLA2G4B
SET;SETSIP
RO60
HLA-C
ITGAM
TOP1
IMPDH2
CKB
COX4I1
COX7A2
HNRNPL
GSPT1
ACP3
UCHL3
POR
YBX3
SMPD1
DDX5
PSMC3
TCP1
RPL35A
RPL17
SRM
CAST
ENDOU
GSTM3
CD9
FBL
SCP2
SPRR2D
UQCRC2
ATP5PB
MPST
RPS12
VARS1
RPL10
MAP4
ABCD3
NDUFS1
MARCKS
DDT
HNRNPH3
RPL9
KIF5B
CTNNA1
CTNNB1
COPB2
ACTN2
ATP6V1E1
SNCA
EIF4A3
RPL3
RPL13A
HADHA
GARS1
IARS1
RPL5
RPL21
RPL28
RPS5
RPS10
QARS1
UQCRFS1
ATP5PO
PITPNB
RPL34
CARS1
ACADVL
TMED10
EMD
DNM2
RAB5C
PLCD1
GALK1
HNRNPF
HK2
ACLY
COPA
SEC24C
RAD23B
NAPA
EIF5
TPD52
ATP5ME
TMEM33
CARD18
SEC61B
GABARAPL2
S100A10
RAB8A
RPL26
ATP6V0D1
COPZ1
UFM1
PPP1CA
RPS11
SNRPE
LSM3
ARF6
PSMC6
RPL23A
RPL23
RPS26
RPS28
PPP2R2A
SNRPB;SNRPN
RPS21
PPP2CA
YBX1
CSNK2A1;CSNK2A3
RPL24
FKBP3
SPTBN1
HMGCS1
EWSR1
LMNB2
MVK
TLE3
CKAP4
TJP1
SRSF1
ARHGAP1
PPP3CA
GALNT1
TWF1
AIMP1
ILF2
MYO1E
PDZK1IP1
PAK2
EIF3I
UBE2V1
DYNC1I2
IL18
DCTN1
TRIM25
NUMA1
KARS1
EIF4H
ACOX1
PAFAH1B3
PEA15
PMVK
NONO
PTPA
SF3A2
PPP1R7
SEC23B
MAPRE1
MLF2
STXBP2
ADRM1
PSMD5
DDB1
CDC37
RBBP4;RBBP7
SRSF7
DECR1
TTC39B
ANKRD22
CYB5R2
CIAPIN1
HEPHL1
CYP4F22
SLC27A4
PRPF8
ACP7
H2AZ2
BZW1
DCXR
HUWE1
KTN1
NLRP10
FCHSD1
CERS3
ALDH16A1
ABI1
CCAR2
ANKRD35
SDR16C5
TXNDC5
SERBP1
ATP6V1C2
CMAS
PPP1R13L
TM9SF4
NDRG1
GCN1
HTRA1
TAF15
DDX17
BCL2L2;PABPN1
KLK6
H2AC6
MAL2
AP2M1
OTUB1
PDLIM5
DDRGK1
PDLIM2
DHRS1
RDH12
PSMD1
SEPTIN5
HNRNPAB
NAP1L4
PRMT1
SH3GL1
DHRS9
ARPC5L
CORO1B
TXNDC17
PRXL2A
ESYT1
TMEM43
TMEM109
TMED9
SARG
NMES1
TNKS1BP1
PRSS22
NT5C3A
SDCBP2
NUCKS1
EPN3
CPVL
UNC45A
CHMP4B
EPS8L2
MYG1
DYNLRB1
NIT2
KIF13B
SAR1A
CTNNBIP1
FARSB
ADPRS
SMPD3
TMOD3
EHD3
VAPA
RRBP1
LARS1
DPM3
EPS15L1
DHCR7
EIF3K
GRHPR
TJP2
IL36A
SRP68
SEPTIN9
CYB5R1
ATP6V1H
KLK9
SNX12
NDRG2
SNX6
NSFL1C
RTRAF
RUVBL2
EIF3L
PLAA
FARSA
NCKAP1
CARHSP1
STARD10
CAB39
UFC1
CRYBG1
HEBP2
COPG1
DYNC1LI1
WASF2
IGKV2D-30
ALB
HLA-DQB1
NDUFA10
PLA2G4E
OTC
CNOT1
NCF1;NCF1B;NCF1C
SNRPG;SNRPGP15
CNN2
MAPK14
CLU
NDUFS8
IPO5
LCE2B;LCE2C
PTGES
TAX1BP3
GIPC1
HGS
HNRNPDL
XPO1
ACOX3
ALOX15B
TAPBP
DHX15
NDUFB3
CYTH2;CYTH3
SPAG9
SNX3
UGDH
DKC1
EIF5B
EDF1
ATP6V1G1
NDUFS3
SRSF10
SF3B1
CSDE1
ZMPSTE24
ATP5PD
ATP5MG
SRP72
TOMM70
DUSP14
LETM1
ATG7
TRIM16
NRAS
SSB
MYL1;MYL3
PTMA
EIF4E
HEXA
PRSS2
TPM2
ASNS
CYC1
RPS17
GNAI3
SNRPA1
SAA1
PDHB
ACADM
SLC25A6
ETFA
PRKAR2A
ANXA8
HPGD
COX7C
PNLIP
JUNB
NDUFV2
GGT1
TCN2
COX5A
GART
DGKA
ACAT1
DDX6
TARS1
MAPK3
APEX1
EPHA2
ECHS1
CLIP1
SDHA
DNAJA1
ATIC
ACSL1
SHMT2
RPA3
CPOX
DLST
ETFB
ARL1
NAA10;NAA11
ACTR1B
TMPO
STAT1
AKR1C1;AKR1C3
RPS27
MATR3
RANGAP1
PSMD8
FNTA
INPP1
IDH3A
BCAP31
PSMD7
RPS6KA3
HDGF
HSPA2
SLURP1
ADK
SNU13
MARS1
RAB38
MTPN
PPP4C
KRTDAP
RAB5B
UBE2M
ABCE1
PSME3
MAGOH;MAGOHB
HPCA;HPCAL1;NCALD
SEC61A1
AP1S1
RPS29
VSNL1
RPS15
RPS24
FAU
RPL30
RPL32
RPL38
SEC11A
EIF4G2
U2AF1
PLCB3
OGDH
TOP2B
SLC25A11
EIF4G1
DNM1
GFPT1
KHDRBS1
GOLGA2
SF3A3
HNRNPA0
NME3
SRSF6
TRIM28
G3BP1
SF3B2
PICALM
HDAC1
STIM1
CUL3
UBAP2L
TTLL12
LY6D
ITPR3
GOLGB1
EFTUD2
PLEC
PON2
RNPS1
KRT31
TMED2
MAPRE2
NSDHL
IFI16
TST
HNRNPUL2
HSD17B12
HP1BP3
UBR4
ABHD17B
BROX
PEAR1
PLA2G4F
ATL3
LAMTOR1
HIBCH
RAB11FIP1
TOM1L2
EIF3M
RRAGA
MOB1B
NUP54
MTDH
NLRX1
ALYREF
RETREG3
AHNAK2
PARP9
NUP93
LRRC47
NHLRC2
ABCF1
PPP4R1
SCFD1
PSPC1
DDX1
AP3S1
HSPH1
ANP32B
OSTF1
LRRC59
DAZAP1
CYFIP2
CAPNS2
MBOAT7
RBM14
TTC1
CPNE1
WDR77
PYM1
DCTN5
PAXX
BDH2
TPPP3
ELOVL1
UBL5
RAB1B
EHD4
PPA2
DPEP3
CWH43
PPCS
RRAGC;RRAGD
TMEM165
MUC5B
TIGAR
SH3GLB2
DUOX1
KRT82
ATG3
ABCF3
DDX19A
NECAP2
CHCHD3
TECR
ACTR10
RELCH
COMMD3
GNG12
VPS29
LAMTOR3
SHPK
PFDN2
ENOPH1
EIF2B4
AK3
LNPEP
SLC25A13
STOML2
HECTD1
PRPF19
SRRM2
BAIAP2
DRG1
DIS3
GSTK1
GDA
NOP58
FIS1
STRAP
RPL36
USP15
TLN2
AFG3L2
ATP6V1D
GMPPB
RBM8A
PSAT1
BZW2
SLC30A1
SERPINA1
IGLV5-48
IGHV1-24
TNXB
SPRR5
WDR26
AIFM1
GOLGA3
ACTC1
SHTN1
ILVBL
SH3PXD2A;SH3PXD2B
FAM83G
TMBIM1
ACTB
SERPINB13
ATP5MF-PTCD1
TRIM29
PELP1
RNF225
SGK1
STXBP3
LGALS8
RTCA
VWA5A
NOP56
PIR
KPNA4
PPP6C
CES2
CCS
ABLIM1
TCERG1
SCAMP3
HAT1
PLD2
SEC16A
NPC1
SMAD2;SMAD3;SMAD9
SURF4
SPTLC1
PPM1G
EIF3D
YKT6
RNMT
DYNC1LI2
ZNF207
BUB3
SGTA
KRT86
MYO1B
NUDT21
LANCL1
IDH3B
KIF1C
SMARCA1;SMARCA5
NMT2
DPM1
DNAJA2
CUTA
NOL3
LILRB5
DNAJB6
PRPF40A
MTX2
STX11
PRKRA
USP2
EIF3G
EIF3J
CBR3
AP1G2
RBBP9
DCTN3
CLPX
NEBL
MTA2
MYO1D
[truncated: 413 more rows]

## Sheet: Sheet 2
Sheet 2. Differentially expressed proteins between the younger (20–39 years) and middle-aged (40–59 years) groups.
20-39 age group vs 40-59 age group
Up	Down
	SNED1

## Sheet: Sheet 3
Sheet 3. Differentially expressed proteins between the middle-aged (40–59 years) and older (60–79 years) groups.
40-59 age group vs 60-79 age group
Up	Down
S100A9	SERPINF2
S100A8	SLC3A2
APOD	RNF123
LTF	CNTN3
IGKV2-24;IGKV2D-24	ZNF518A
C3 fragment
LYZ
IGHV3-74
TKT
LCN2
CALR
C4BPB

## Sheet: Sheet 4 
Sheet 4. Differentially expressed proteins between the younger (20–39 years) and older (60–79 years) groups.
20-39 age group vs 60-79 age group
Up	Down
AHSG	ABI3BP
AMBP	ADAMTS13
APMAP	ANGPTL6
APOD	ANPEP
C3 fragment	APOL1
C4BPA	BCHE
C4BPB	BTD
CD163	C1QB
CD5L	CA2
CFH	CACNA2D1
CFHR1	CD109
CFHR2	CDH13
CFHR4	CFP
CRTAC1	CNTN3
CST3	CNTN4
ECM1	COLEC10
EFEMP1	CSF1R
F9	DBH
FGA	DPP4
FGB	EXTL2
FGG	FAP
GC	FCGR3B
HABP2	FCN3
IGF2	GP1BA
IGFBP6	H6PD
IGHA2	HPR
IGHG1	IGFALS
IGLC2;IGLC3	IGFBP3
IGLC7	IGFBP5
IGLL5	IL1RAP
LUM	ITIH4
LYZ	KNG1
PI16	LAMP1
RBP4	LAMP2
SERPINA11	MINPP1
SHBG	MMRN2
	MST1
	NAGLU
	NCAM1
	OLFM1
	PCSK9
	PDIA3
	PLTP
	PON3
	PRCP
	PRG2
	PROCR
	PTPRF
	PTPRS
	RNF123
	SELL
	SERPINA6
	SERPINF2
	SLC3A2
	SNED1
	TNC
	TNXB
	ZNF518A

## Sheet: Sheet 5
Sheet 5. Proteins consistently downregulated in both the middle-aged and older groups compared with the younger group.
20-39 age group vs 40-59 age group (Down)	20-39 age group vs 60-79 age group (Down)
SNED1	CFP
	C1QB
	KNG1
	SERPINF2
	PON3
	COLEC10
	IGFBP5
	SELL
	PLTP
	MST1
	IGFBP3
	PRCP
	SERPINA6
	EXTL2
	ANGPTL6
	CSF1R
	MINPP1
	LAMP1
	CNTN4
	IL1RAP
	TNC
	FAP
	IGFALS
	FCGR3B
	OLFM1
	PCSK9
	BTD
	ADAMTS13
	CACNA2D1
	NAGLU
	BCHE
	CD109
	PTPRS
	DPP4
	MMRN2
	GP1BA
	APOL1
	PRG2
	LAMP2
	SNED1
	HPR
	ABI3BP
	TNXB
	PROCR
	CNTN3
	CDH13
	NCAM1
	DBH
	PDIA3
	FCN3
	ANPEP
	CA2
	ITIH4
	RNF123
	H6PD
	PTPRF
	SLC3A2
	ZNF518A

## Sheet: Sheet 6
Sheet 6. Proteins consistently downregulated in the older group compared with both the younger and middle-aged groups.
40-59 age group vs 60-79 age group (Down)	20-39 age group vs 60-79 age group (Down)
SERPINF2	CFP
SLC3A2	C1QB
RNF123	KNG1
CNTN3	SERPINF2
ZNF518A	PON3
	COLEC10
	IGFBP5
	SELL
	PLTP
	MST1
	IGFBP3
	PRCP
	SERPINA6
	EXTL2
	ANGPTL6
	CSF1R
	MINPP1
	LAMP1
	CNTN4
	IL1RAP
	TNC
	FAP
	IGFALS
	FCGR3B
	OLFM1
	PCSK9
	BTD
	ADAMTS13
	CACNA2D1
	NAGLU
	BCHE
	CD109
	PTPRS
	DPP4
	MMRN2
	GP1BA
	APOL1
	PRG2
	LAMP2
	SNED1
	HPR
	ABI3BP
	TNXB
	PROCR
	CNTN3
	CDH13
	NCAM1
	DBH
	PDIA3
	FCN3
	ANPEP
	CA2
	ITIH4
	RNF123
	H6PD
	PTPRF
	SLC3A2
	ZNF518A

## Sheet: Sheet 7
Sheet 7. Proteins consistently upregulated in the older group compared with both the younger and middle-aged groups.
40-59 age group vs 60-79 age group (Up)	20-39 age group vs 60-79 age group (Up)
S100A9	APOD
S100A8	FGB
APOD	ECM1
LTF	FGG
IGKV2-24;IGKV2D-24	IGLC7
C3 fragment	LYZ
LYZ	IGFBP6
IGHV3-74	IGLC2;IGLC3
TKT	IGLL5
LCN2	SHBG
CALR	CFHR4
C4BPB	FGA
	C3 fragment
	CRTAC1
	EFEMP1
	AMBP
	IGHA2
	CFHR1
	CD5L
	CFHR2
	HABP2
	RBP4
	C4BPB
	PI16
	IGHG1
	IGF2
	GC
	C4BPA
	CFH
	LUM
	SERPINA11
	CD163
	APMAP
	CST3
	F9
	AHSG

## Sheet: Sheet 8
Sheet 8. Clustering analysis data for age-associated plasma proteome changes in healthy individuals.
Protein	Cluster	Protein	Cluster	Protein	Cluster	Protein	Cluster	Protein	Cluster	Protein	Cluster		Protein
AMBP	1	ADA2	2	ABI3BP	3	A1BG	4	APOC4	5	ACTA1	6		Unchanged
APMAP	1	ANG	2	ADAMTS13	3	A1BG.1	4	C4B	5	ALDOC	6		A2M	C7	F9	IGHG3	OLFM1
APOB	1	APOC1	2	ADAMTSL2	3	ACE	4	C5	5	C6	6		ACTB;ACTG1	C8A	FAM20C	IGHM	P4HB
APOD	1	APOC3	2	ANGPTL6	3	ADAMTSL4	4	C9	5	CAT	6		ACTBL2	C8G	FBLN1.1	IGHV3-64D	PCYOX1
APOE	1	ATRN	2	APOA2	3	ADGRF5	4	COL18A1	5	CFL1	6		ADGRG6	CACNA2D1	FBLN5	IGHV3OR16-12	PDIA3
APOM	1	C3 fragment	2	APOH	3	ADIPOQ	4	CP.1	5	CP	6		AFM	CAMP	FBN1	IGKC	PGK1
AZGP1	1	CALR	2	APOL1	3	AGT	4	CRISP3	5	ENO1	6		AHSG	CD109	FCGBP	IGKV1-5	PI16
C4BPA	1	CFI	2	BST1	3	ANTXR2	4	FETUB	5	FERMT3	6		ALB	CD93	FGG	IGKV2-29	PKM
CD163	1	CLEC3B	2	C8B	3	AOC3	4	ITIH4.1	5	FLNA	6		ALCAM	CDH13	FLT4	IGKV2-30	PON1
CD5L	1	CPB2	2	CA1	3	APOA1	4	SAA2-SAA4	5	HBB	6		ALDOA	CFD	FN1	IGKV3-11;IGKV3D-11	PRCP
CFHR1	1	FGL1	2	CA2	3	BTD	4			IGHV3-49	6		ALDOB	CFH	GAPDH	IL1RAP	PRG2
CFHR2	1	HSPG2	2	CDH5	3	CD14	4			IGKV2-28;IGKV2D-28	6		AMY2A	CFHR5	GGH	ITIH1	PROS1
CFHR4	1	IGHV3-7	2	CNTN1	3	CD44	4			KNG1	6		ANPEP	CFP	GLIPR2	ITIH2	PTPRG
COMP	1	IGHV3-74	2	CNTN3	3	CDH1	4			LTA4H	6		APCS	CHL1	GNPTG	ITIH4.2	PTPRJ
ECM1	1	IGKV2-24;IGKV2D-24	2	COL6A1	3	CETP	4			MSN	6		APOA4	CLU	GOT1	KNG1.1	QSOX1
EFEMP1	1	IGKV3-20	2	CPN1	3	CPN2	4			PFN1	6		APOC4-APOC2	CNDP1	GP1BA	KRT1	RARRES2
F2	1	INHBC	2	CTBS	3	DCD	4			PGLYRP2	6		APOF	CNTN4	GPNMB	KRT2	S100A8
F5	1	LBP	2	CTSZ	3	F12	4			POTEI	6		B3GNT2	COL6A3	GPX3	KRT9	SERPIND1
FGA	1	LCN2	2	DBH	3	FCN2	4			TLN1	6		B4GAT1	COLEC10	GSN.1	LAMP2	SERPINF1
FGB	1	LTF	2	ENPP2	3	GSR	4			VCL	6		BCHE	COLEC11	GSS	LCAT	SERPINF2
GC	1	MAN1A1	2	EXTL2	3	IGFBP7	4			YWHAZ	6		C1QA	CPQ	GSTO1	LCP1	SERPING1
HABP2	1	MRC1	2	F10	3	IGKV1-33	4						C1QB	CRTAC1	HBA1	LDHA	SOD3
HGFAC	1	OAF	2	F11	3	IGKV3D-15	4						C1QC	CSF1R	HLA-B	MAN2A1	TFRC
IGFBP6	1	ORM1	2	F13B	3	IGKV4-1	4						C1R	CST3	HP	MASP1	THBS4
IGHG1	1	POSTN	2	F7	3	IGLV1-47	4						C1RL	CTSB	HPX	MDH1	TIMP1
IGHV3-72	1	PTGDS	2	FAH	3	IL6ST	4						C1S	CTSD	HSPA8	MMP2	TIMP2
IGHV6-1	1	S100A9	2	FAP	3	ITGB1	4						C2	DPP4	IGF2	MST1	TPI1
IGKV3-7	1	SELENOP	2	FBLN1	3	LGALS3BP	4						C3	DSG2	IGHA1	NAGLU	VCAM1
IGKV3D-20	1	TKT	2	FCGR3A	3	LRG1	4						C4A	EZR	IGHA2	NCAM2	VTN
IGLC2;IGLC3	1			FCGR3B	3	LRP1	4						C4BPB	F13A1	IGHG2
IGLC7	1			FCN3	3	MCAM	4
IGLL5	1			FUCA1	3	MEGF8	4
ITIH3	1			FUCA2	3	NRP1	4
LDHB	1			GP5	3	OIT3	4
LPA	1			GPLD1	3	PEBP4	4
LUM	1			GSN	3	PEPD	4
LYVE1	1			H6PD	3	PLA2G7	4
LYZ	1			HLA-A	3	PROCR	4
MARCO	1			HPR	3	PVR	4
PCOLCE	1			HRG	3	SELL	4
PLG	1			HSP90B1	3	SERPINA1	4
PROC	1			HSPA5	3	SERPINA4	4
RBP4	1			IGF2R	3	SERPINA7	4
SERPINA11	1			IGFALS	3	SPARCL1	4
SHBG	1			IGFBP3	3	SPP2	4
TF	1			IGFBP5	3	SSC5D	4
VASN	1			IGHG4	3	TTR	4
VWF	1			IGHV3-15	3
				ITIH4	3
				JCHAIN	3
				KLKB1	3
				KRT10	3
				LAMP1	3
				MASP1.1	3
				MASP2	3
				MBL2	3
				MINPP1	3
				MMRN2	3
				NCAM1	3
				NEO1	3
				NID1	3
				PCSK9	3
				PLTP	3
				PLXDC2	3
				PON3	3
				PRDX2	3
				PRG4	3
				PROZ	3
				PTPRF	3
				PTPRM	3
				PTPRS	3
				RNF123	3
				SEMA4B	3
				SERPINA10	3
				SERPINA3	3
				SERPINA5	3
				SERPINA6	3
				SERPINC1	3
				SLC3A2	3
				SNED1	3
				TGFBI	3
				THBS1	3
				TNC	3
				TNXB	3
				ZNF518A	3

## Sheet: Sheet 9
Sheet 9. Proteins identified in the cognitive decline cohort.
Proteomic analysis quantified 1494 proteins by LC/MS method
IGKV3-7
IGKV2-28;IGKV2D-28
IGKV2-24;IGKV2D-24
IGHV3OR16-12
SAA2-SAA4
IGHV3-49
HLA-A
KRT10
C4B
C1R
IGHV3-72
C3
CFH
GSN
ITIH3
IGKV1-33
APOB
IGLC7
SSC5D
IGKV2-29
FBLN1
ITIH4
IGLL5
CFI
APOC4-APOC2
MASP2
CLIC1
QSOX1
CHL1
NRP1
APOL1
CD5L
WDR1
FCN3
ATRN
APOM
H6PD
LDHA
GSR
CP
F13A1
PGK1
F2
HP
HPR
F9
F10
CFD
PLG
F12
CA1
CA2
SERPINC1
SERPINA1
SERPINA3
AGT
A2M
C3
C5
TIMP1
CST3
KNG1
KNG1
IGF2
IGKV3-20
IGLV1-47
IGHV3-7
IGKC
IGHG1
IGHG2
IGHM
IGHA1
IGHA2
APOA1
APOE
APOA2
APOC1
APOC3
FGA
FGB
FGG
APCS
C1QA
C1QB
C1QC
C9
APOH
LRG1
FN1
RBP4
AMBP
AHSG
TTR
ALB
GC
TFRC
TF
HPX
ANG
F11
KLKB1
C4BPA
VTN
CAT
FUCA1
PROC
ALDOA
LCAT
HRG
A1BG
KRT1
VWF
SHBG
GAPDH
ALDOB
APOD
SERPINA5
SERPING1
F13B
CLEC3B
SERPINA7
SERPIND1
ITGB1
BCHE
IGKV4-1
GSN
C2
APOA4
ENO1
TPM3
LDHB
PROS1
CSF1R
CTSD
C8A
C8B
C8G
PFN1
THBS1
SERPINA6
SLC3A2
MMP2
SOD3
ITGA2B
LPA
PLEK
CD14
SERPINF2
F7
C1S
ALDOC
C4A
POTEI
IGLC2;IGLC3
C7
CLU
HSPA5
HSPA8
MBL2
LAMP1
CETP
IGF2R
COL6A1
COL6A3
F5
ACE
PEPD
NCAM1
C6
PRG2
LCP1
SELL
PKM
HSP90B1
ANPEP
CPN1
EZR
TIMP2
CD44
FAH
IGFBP3
IGFBP2
VCL
LBP
VCAM1
ITIH2
ITIH1
C4BPB
FLNA
TNXB
GPX3
CPN2
PROZ
MRC1
FBLN1
CFL1
IGFBP6
IGFBP5
AZGP1
MSN
MST1
PON1
DPP4
CALR
CFP
TKT
SERPINA4
PDIA3
PRDX2
CDH5
MAN1A1
KRT9
IGFALS
KRT2
SERPINF1
CFHR2
COL18A1
GP5
PTGDS
MCAM
BTD
AFM
MASP1
MASP1
COMP
SELENOP
CAMP
LUM
ARHGDIB
CRISP3
CACNA2D1
NAGLU
APOC4
PLTP
CDH13
TPI1
ACTB;ACTG1
RAP1B
LYZ
YWHAZ
TPM4
ACTA1
HBB
GSTO1
GPLD1
HSPG2
CTBS
CFHR1
HGFAC
LRP1
LGALS3BP
BST1
EFEMP1
CNTN1
SPP2
ENPP2
SPARCL1
HABP2
ITIH4
ITIH4
POSTN
PCOLCE
PON3
RSU1
FCN2
TGFBI
ADIPOQ
IGFBP7
ECM1
AOC3
ACTBL2
VASN
PLXDC2
PI16
ADAMTSL4
ADAMTS13
ABI3BP
MEGF8
SERPINA11
OAF
FERMT3
CD163
PCSK9
GGH
NEO1
PRG4
CPB2
CNDP1
PGLYRP2
OLFM1
RARRES2
FUCA2
COLEC11
CFHR5
GLIPR2
MMRN2
APMAP
IL1RAP
CRTAC1
C1RL
EXTL2
FETUB
PCYOX1
GNPTG
SERPINA10
MINPP1
TLN1
LYVE1
FCGBP
COLEC10
CTSB
HLA-B
B4GAT1
IGHG4
ITGB3
FCGR3A
DBH
LTA4H
KRT5
NID1
OGN
TNC
THBS4
INHBC
ANTXR2
PPIA
DCD
CAP1
FGL1
FAP
PLA2G7
GPNMB
MAN2A1
RNF123
PEBP4
CD93
B3GNT2
IGKV3D-15
A1BG
AMY2A
IGKV2-30
PTPRF
PZP
IGFBP4
FBN1
TAGLN2
IL6ST
MDH1
GSS
PTPRS
ILK
DSG2
CD109
PARVB
SEMA4B
CPQ
IGKV3-11;IGKV3D-11
PNP
CRP
S100A9
MYH9
ACTR3
TUBA4A
APOF
ADGRG6
HRNR
C1QTNF3
IGHV3-74
CAVIN2
KRT6A
P4HB
GP1BA
KRT16
SFN
TALDO1
PRCP
LIMS1
ARPC4
COTL1
ADAMTSL2
ANGPTL6
TUBA1C
TUBB1
ADA2
MARCO
CORO1C
ANGPTL3
CP
NCAM2
ACTN4
FCGR3B
JCHAIN
IGKV1-5
KRT14
S100A8
RNASE1
ACTN1
SERPINB1
CORO1A
MFAP4
LCN2
CNTN4
CFHR4
PARK7
CTSZ
CTSF
FBLN5
PROCR
IGHV3-15
IGHV4-30-4;IGHV4-34;IGHV4-38-2;IGHV4-39;IGHV4-59;IGHV4-61
GPI
CDH1
NME2
CAPZA1
PTPRJ
IGLV7-46
IGKV3D-20
IGKV1-6
IGHG3
MET
TFPI
PVR
CHI3L1
GDI2
ALCAM
IGHA2
HGFAC
GSTP1
DSC1
FSTL1
GP1BB
HBA1
FAM20C
SNED1
IGHV5-51
TUBB
LAMP2
B4GALT1
PTPRG
CD248
ERAP1
CNTN3
IGLV4-69
IGKV1-27
UMOD
CALML5
NOTCH3
KRT6B
SH3BGRL3
CAPN1
B2M
IGLV3-21
RTN4RL2
OIT3
IGHV6-1
VNN1
KIT
PSMA4
RAB10
YWHAG
GANAB
ZNF518A
CBLN4
ARPC2
RECK
VASP
DSG1
SUN3
PLXNB2
IDH1
GOT1
PTPRM
FLT4
PGD
RELN
KRT17
PRDX1
IHH
MEGF10
ICOSLG
IGKV1-17
FTL
IGF1
HSP90AA1
GP9
CES1
PPIB
ART3
IGHV3-64D
TGOLN2
ISLR
PSMA7
TUBB6
ARPC1B
ORM1
PIP
S100A7
ACTR2
FLG2
TRHDE
CKM
PSMA1
PRDX6
HSPA1L
HYAL1
FHL1
BLMH
CST6
ZYX
HLA-B
ICAM1
SRC
EXT2
ARPC4
IGKV6D-21;IGKV6D-41
SERPING1
NAP1L1
MASP2
CR2
ITGA6
STOM
IFIT1;IFIT5
IGHV4-28
XPNPEP2
HLA-A
JUP
ORM2
ARHGDIA
VCP
YWHAH
MMRN1
SVEP1
MYOC
AK1
PPBP
ARG1
ANXA2
LAMB1
HSPA1A;HSPA1B
ITGA2
GALNT2
ERAP2
LTF
CAPZB
OPTN
VAT1
IGHV3-38
EGFR
IGLV2-11
CD36
TIE1
CCL18
RAB11B
CCL14
B3GNT8
IGLV8-61
IGKV1-8
ARPC3
IGLV2-8
GSN
LIPC
COL6A3
PDIA4
CTSC
ARF1
KRT73
FAM3C
NIF3L1
BIN2
TGFBI
OLFM2
PRSS1
YWHAB
RNASE4
CALD1
DSC3
KCTD12
ANTXR1
ALDH1A1
GNAI2
PECAM1
CRHBP
MAN2A2
FABP5
ADGRF5
C5
C1S
MYL12A;MYL12B
IGLV1-51
SAA2
DSP
WARS1
LSAMP
CEP192
TPM1
HSPA6
PGAM1
CD9
CNTFR
SERPINB6
SELENBP1
WDR86
KRT78
ADGRL4
MRC2
CHL1
HYI
PLXNB1
KRT75
ENO3
SERPINB3
PM20D1
ITLN1
HEXB
PSMA3
RHOA
EIF5A
DSC2
PDIA6
TUBB8
KRT80
SERPINB12
MAN1C1
NRP2
ZG16
TGFB1
BPGM
KPRP
ROBO4
DNM1L
IGLV3-27
SFTPB
SPARC
CASP14
GNB2
RPS27A
SPON1
SH3BGRL2
HLA-A
H2BC11;H2BC21
FGFR1
GDI1
ITGA1
DSTN
GGCT
IGHV1-69
COL1A1
SOD2
HSP90AB1
AMY1A;AMY1B;AMY1C
COL6A2
RAB1A
SEPTIN7
STAB1
HSPB1
CA3
EEF1G
PSMA6
CDSN
TUBA8
PLXND1
HYOU1
CLSTN1
GPX1
PYGB
KRT3
MYL9
PSMB6
CAPZA2
EXT1
NRCAM
IGKJ5
F8
IGKV1D-16
IGHD
ANXA5
PSMA2
RAB7A
CDC42
RAN
CYCS
REG3A
PCBP1
CLEC4M
C1QA
IGKJ3
IGHV2-70
SERPINA3
ARPC5
ICAM2
RAC2
CSRP1
UBA1
PTPN6
BLVRB
CMPK1
PGM1
ST13
EIF4A1
CLTC
MAPRE2
IGHV1-3
PDLIM1
RAB27B
CHAD
IGLV1-40
APP
CD59
SELP
GPT
LMAN1
DEFA1;DEFA3
TGM3
NEXN
NEGR1
OSMR
OMD
LDHAL6B
RAB33B
CDHR5
F11R
LECT2
SAA1
VCAN
RAB6A
RAB15
GNA13
QSOX2
EHD3
IGHV3-64
IGHV1-46
ALPL
MGP
TXN
RALB
G6PD
ENG
PEBP1
NPEPPS
PFKP
DAG1
LILRA3
RASSF5
DPEP2
SEPTIN11
CD84
ST3GAL6
PODXL
PIGR
REG1A
SRGN
S100A4
STIP1
CSK
RAB14
EEF1A1;EEF1A1P5
TUBB4B
LMAN2
STXBP2
SEPTIN8
ST6GALNAC1
ADH1B
IGKV1-16
PRKCB
FBP1
FLG
L1CAM
ARF5
MADCAM1
PLS1
MYLK
CORO1B
CLIC4
HLA-C
CSTA
IGLV3-19
PRKAR1A
RNH1
IGLL1
LGALS3
PSMB1
FBN2
GMPR
EFEMP1
LASP1
SEPTIN2
DPYSL2
SBSN
KRT23
C3
CTSH
ALAD
PRDX5
PSMB3
PSMB2
POSTN
UGP2
H2AC21
FGFBP2
PA2G4
IGLV10-54
MPIG6B
SERPINE1
MPO
IL1R2
ICAM3
YWHAE
ENPEP
WDR75
PGM2
ABCB6
SPINK5
DBNL
IGLV3-10
SOD1
FDPS
TYMP
ANXA7
PSMB4
CASP3
ME1
PKP1
LGALSL
CYFIP1
BPIFB1
PCDH18
CTSS
IGHV1-18
ANXA4
CTSA
PRKCSH
FABP4
PSMA5
HPD
SPRR1A
LGALS7
NPC2
H4C1
TWF2
APOA5
PDCD6IP
TWNK
OLA1
NTM
CES1P1
IGLV2-18
IGLV5-45
CFH
FGG
FCN1
ATP5F1B
EEF2
PLS3
COL5A1
GRN
PPIC
IDH2
GNAQ
BLVRA
ACTR1A
UBE2L3
TRAP1
LTBP1
FBLN7
SECTM1
RAB8B
MUCL1
PSMB7
GLOD4
HLA-A
VPS13D
TXNL1
AKR7A2
STC2
IGLV2-23
PRSS2
PGA3;PGA4;PGA5
IGHV1-8
CCL5
PSMB8
ERP29
UBA7
KLK7
SEMA3F
PLEC
CNDP2
EHD1
CPA4
KRT86
ENTPD5
IGLV2-14
ADH4
ANXA3
NCAM1
MIF
CBR1
ALOX12
KRT4
HK1
RAB5A
EPHA1
LORICRIN
ATP5F1A
FCER1G
HSPA4
PAFAH1B1
CCT5
ALDH9A1
CCT8
ACLY
EIF6
RAB8A
RAC1
KRT85
CTTN
QPCT
KRT77
IGKV1D-8
LY6G6D;LY6G6F-LY6G6D
AGRN
CREG1
KRT34
HPRT1
IGKV1-39;IGKV1D-39
IGHE
SPTA1
SLC4A1
ANXA1
TPM2
CTSG
MMP9
TGM1
AHCY
YWHAQ
PSMB5
SPRR2A
ATP6V1A
CCT3
MYL6
RAP2B
PPP1CB
ACY1
GBE1
KRT33B
NOMO1;NOMO2;NOMO3
KRT31
TKFC
ASPRV1
ANGPTL8
CAND1
SERPINA12
SMPDL3A
SPG11
FCRL5
SPRR2F
CDHR2
TOLLIP
MUC5B
DKK3
IGKV1-37;IGKV1D-37
IGHV3OR15-7
ALB
IGKV6-21
A2ML1
ETF1
TPP1
FYB1
LILRB5
SERPINB7
CAPNS1
SERPINB2
APRT
IL6R
ENO2
KRT13
GM2A
PPP2R1A
MDH2
ANXA11
PPP1CA
FKBP1A
GRB2
MPP1
SPTBN1
AMPD2
CRYZ
ZMYND11
MAPRE1
STXBP5
KPLCE
H3-7
PEAR1
NAPRT
SND1
KRTAP11-1
CILP2
ADAMTS17
POF1B
PDLIM5
GSDMA
S100A14
DPP3
HPSE
SERPINA1
IGKV2D-30
IGLV9-49
IGHV1-24
IGKV1-12;IGKV1D-12
DDX3X
NACA
SLC17A3
KLK10
TGM5
GMFG
CS
STX11
LYPLA1
CYB5R3
LMNA
ITGB2
SLC25A5
FYN
IVL
IGFBP1
KRTAP2-3;KRTAP2-4
SULT1A3;SULT1A4
VSIG8
HLA-C
IDE
CPB1
AKR1B1
CDH2
TCN2
PCMT1
HNRNPA2B1
RPS3
ACP1
CALML3
CANX
LAP3
PCSK6
S100A11
GLRX
SERPINB5
GARS1
VDAC2
SERPINB8
YARS1
EPPK1
RAB2A
UBE2D3
UBE2N
RACK1
IL13RA1
ARHGAP1
AHNAK
MGAT2
UBE2V1
TRIM29
RASA3
PPP1R7
KRTAP13-4
KRTAP13-2
YOD1
SBSN
NCCRP1
MOB1B
PKHD1L1
TMPRSS6
KRTAP13-1
LRRC15
HTRA1
EVPL
KLK6
PLD4
S100A16
SEPTIN5
KRTAP3-3
KRTAP3-1
KRTAP2-1;KRTAP2-2
PSTPIP2
RTN4
KRT84
IGKV1-13;IGKV1D-13
OTC
KRTAP9-2;KRTAP9-3;KRTAP9-7;KRTAP9-8;KRTAP9-9
KRT19
ACOT7
CES2
IMPA2
PHGDH
SYNGR2
PPL
CTSV
CPNE3
ALOX12B
FLNB
TSPAN9
KRT33A
PDE5A
DUSP14
EML2
DDAH2
GLUD1
NRAS
HBD
GBA1
CSTB
ALDH2
S100A6
PYGL
HEXA
ADH1A
EPRS1
ELANE
KRT19
RPSA
HMOX1
HNRNPA1
H2AC11;H2AC12;H2AC14;H2AC18;H2AC20;H2AJ
CALM1;CALM2;CALM3
ESD
GHR
RALA
TPT1
APEH
AKR1A1
PLA2G2A
DARS1
IL1RN
KRT15
GGT1
VDAC1
PAICS
SPRR1B
SPRR2D
MPST
S100P
PTBP1
MAPK1
CRABP2
RPL12
AXL
LCN1
KIF5B
RPL22
ATP6V1E1
SNCA
RPL3
CAPG
CCT6A
HAL
SSR1
USP5
PIP4K2A
SERPINB4
MASP1
RPIA
FASN
ALDH7A1
CCT4
RAB5C
ALDH3A2
NDST1
HSPA2
NAPA
SUMO2;SUMO3;SUMO4
S100A10
NUTF2
HNRNPK
RPS16
RPS11
RPL23
RPL8
DYNLL1
H3-3A;H3-4;H3C1;H3C15
CCT2
SLC25A3
NUCB1
RPL6
GLO1
PTPN12
CDH17
ASAH1
DCTN2
TUBB2A
DYNC1H1
KRT81
KPNB1
PTGES3
TMED2
PCBP2
SYPL1
FSCN1
CCL15
DMKN
MYH14
KRTAP7-1
ALDH16A1
NHLRC2
TXNDC5
EPS8L1
HAS1
MAL2
ZG16B
CAPNS2
MGST2
CCT7
CADM1
SPRR2G
KRTAP4-9
KRTAP4-7
KRTAP4-4
KRTAP3-2
LACRT
RNASE7
EHD4
CPVL
SAR1A
OLFML3
KRT82
IL36G
VAPA
GRHPR
TJP2
CRCT1
SERPINB13
NAGK
DBNL
NSFL1C
CAB39
NEU2
PKP3
IGHV3-43
TNXB
SPRR5
ACTB
LRBA
PLA2G4E
HEG1
MAPK14
ACTB
GNPDA1
HSPA8
LMO7
TUBA1A
GFAP
PSMD12
LCE2B;LCE2C
PTGES
SPTBN2
ZNF185
MAPK13
EIF3H
PSMD3
CYTH2;CYTH3
NARS1
LANCL1
SNX3
SYNCRIP
PLIN3
UGDH
ROCK2
MACROH2A1
VPS26A
SKAP2
GRAP2
GLRX3
KRT36
SCEL
PGLS
AP2A1
CLIC3
LY6G6C
CRYAB
SEMG1
ASL
RPN1
EIF2S1
RPLP1
RPLP2
RPLP0
MYL1;MYL3
EIF4E
H1-0
HNRNPC
ANXA6
MME
VIM
GNAI3
QDPR
DLD
RO60
GAA
H1-4
HSPD1
MTHFD1
PABPC1
HARS1
CKB
PRKAR2A
ANXA8
GLUL
GSPT1
ACP3
RPS2
PNLIP
SMPD1
PSMC3
TCP1
ARF4
RPL7
LMNB1
CAST
GSTM3
ATP6V1B2
NT5E
SFPQ
PRTN3
EEF1B2
RPL13
TARS1
RPL10
MAP4
EEF1D
SDHA
MAT2A
ATIC
CDA
DSG3
S100A3
CTNNB1
PHB1
COPB2
ACTN2
PSMC2
CPOX
RPL4
DLST
ADH7
STAT3
EIF2S3
RPL35
RPL27A
RPS9
RPS10
IQGAP1
PREP
ARCN1
AARS1
SARS1
ACADVL
TMED10
RPL14
PLCD1
SSR4
HSD17B4
THOP1
CRIP2
COPB1
COPA
RARS1
USP14
AK2
SLURP1
TPD52
HNRNPH2
EIF3B
RAB25
SEC61B
GABARAPL2
PRPS1
KRTDAP
RAB5B
RPS3A
RPL26
RPL15
RPL27
HSPE1
RPS7
PSMC1
PSMC5
RPS8
RPS15A
RPS14
RPS18
RPS13
SNRPD3
RPL7A
RPS25
RPS28
RPL30
RPL31
RPL10A
RPL11
PPP2R2A
PAFAH1B2
KRT83
RPL19
SRSF3
MUC5AC
FKBP3
SORD
PTPN11
PSME1
RPL18
CKAP4
PPP3CA
AP1B1
ILF2
ILF3
LCP2
NME3
TUBB3
PIN1
GFUS
SPTAN1
DCTN1
LY6D
FAT1
KRT32
MVP
PTGR1
PSMD6
PPA1
PTPA
SHH
CDC37
ECM1
INF2
SPINK9
H2BC18;H2BC9
LCE3E
LCE1A
ABHD17B
ANXA8L1
FLNA
PLBD1
DOK3
DCXR
VMO1
S100A7A
DSG4
PLD3
AHNAK2
LYG1
SDR9C7
OSTF1
USP7
ART4
CYFIP2
PERP
ABHD14B
SERPINB12
VPS35
NIBAN2
CDC5L
NAP1L4
CPNE1
GAL3ST1
ARPC5L
TREX2
TXNDC17
ERP44
ESYT1
TMEM43
PDCD10
TMEM109
TMED9
ALOXE3
KRTAP4-3
UBL5
RNPEP
BPIFA1
RAB18
IL37
SPRR3
IL36RN
DMBT1
SUN2
LNPEP
GPR160
HSPB8
NUDT5
PSME2
PYCARD
PACSIN2
NCKAP1
SAMHD1
TLN2
GMPPB
HEBP2
COPG1
ENPP4

## Sheet: Sheet 10
Sheet 10. Differentially expressed proteins between non-demented controls (NC) and patients with mild cognitive impairment (MCI).
NC vs MCI
Up	Down
ACTA1	APOD
ACTBL2	APOM
ACTN1	CFHR4
ACTN4	DCD
ACTR3	ECM1
ADA2	GC
ARHGDIB	IGF2
CA2	KNG1
CALR	LUM
CAP1	TNXB
CAVIN2
CD44
CFL1
CLIC1
CORO1A
COTL1
ENO1
EZR
F5
FLNA
GAPDH
HSPA8
IGHV3-7
IGHV3-74
IGHV3OR16-12
IGKV2-24;IGKV2D-24
ILK
ITGB3
LTA4H
MAN2A1
MRC1
MSN
MYH9
NID1
PARK7
PARVB
PFN1
PGK1
PKM
PLEK
PNP
POTEI
PPIA
PRCP
RAP1B
RSU1
S100A9
SERPINB1
SFN
TALDO1
THBS1
TIMP2
TLN1
TPI1
TPM3
TPM4
TUBA1C
TUBA4A
TUBB1
WDR1

[truncated: 5 more sheets: Sheet 11, Sheet 12, Sheet 13, Sheet 14, Sheet 15]
